# Supplementary material for: The magnetic-nanoparticle-assisted sensitive detection of nitrated α-syn in blood based on a sensitizing electrochemical layer
Source: Royal Society of Chemistry journal article supplement (doi:10.1039/d1nr01415c), 2021-01-01
Supplement: d1nr01415c1.pdf [file d1nr01415c1.pdf]

## Electronic Supplementary Information

### Magnetic nanoparticles assisted sensitive detection of nitrated $\alpha$ -syn in blood based on sensitizing electrochemical layer

Zhao-huan Zhang, ‡<sup>a</sup> Junjie Hu, ‡<sup>b</sup> Qiang Chen, <sup>c</sup> Jie Chen, <sup>b,c</sup> Xiaojun Hu, <sup>b</sup> Kwangnak Koh, <sup>d</sup>  
Hongxia Chen, <sup>\*b</sup> and Xiao-hui Xu <sup>\*e,f</sup>

a. Department of Laboratory Medicine, Changzheng Hospital, Naval Medical University,  
Shanghai, 200003, PR China

b. Center for Molecular Recognition and Biosensing, School of Life Sciences, Shanghai  
University, Shanghai 200444, PR China. E-mail: hxchen@shu.edu.cn

c. School of Medicine, Shanghai University, Shanghai 200444, PR China

d. Institute of General Education, Pusan National University, Busan, 609-735, Republic of Korea

e. School of Preclinical Medicine, Wannan Medical College, Wuhu 241001, PR China. E-mail:  
xxhxxh@shu.edu.cn

f. School of Life Sciences, Shanghai University, Shanghai 200444, PR China

‡These authors contributed equally to this work.

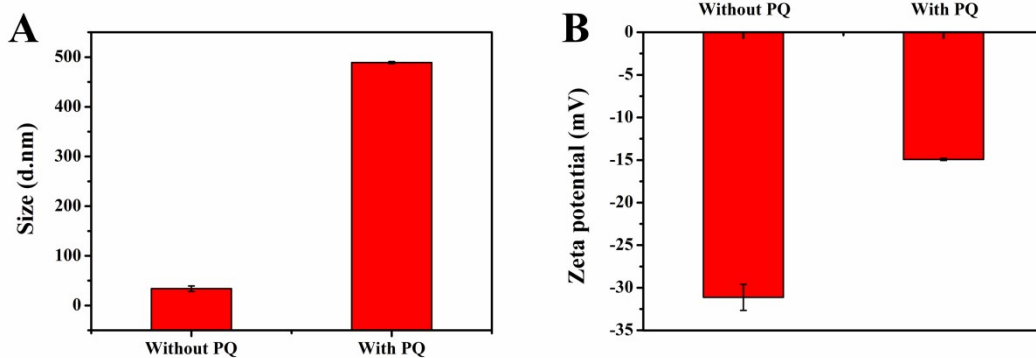

**Fig. S1.** Dynamic light scattering (A) and zeta potential results (B) of AuNPs with or without PQ.

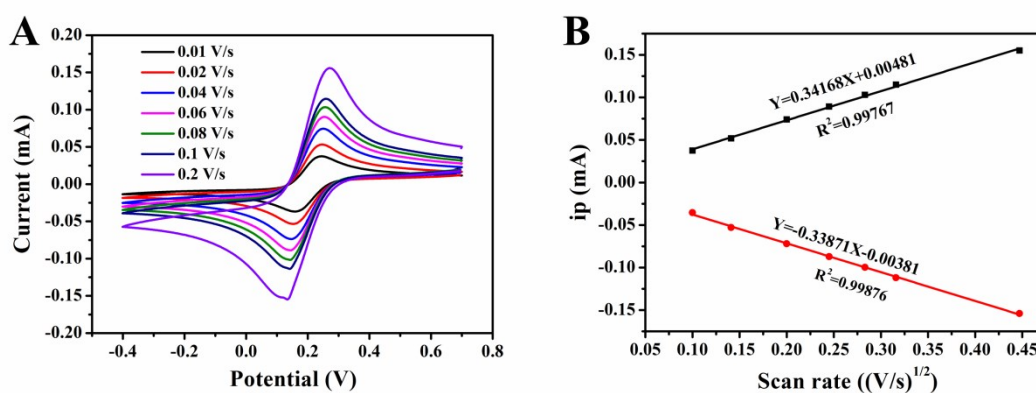

**Fig. S2.** (A) Diffusion control process for bare gold electrode, and (B) corresponding calibration curves.

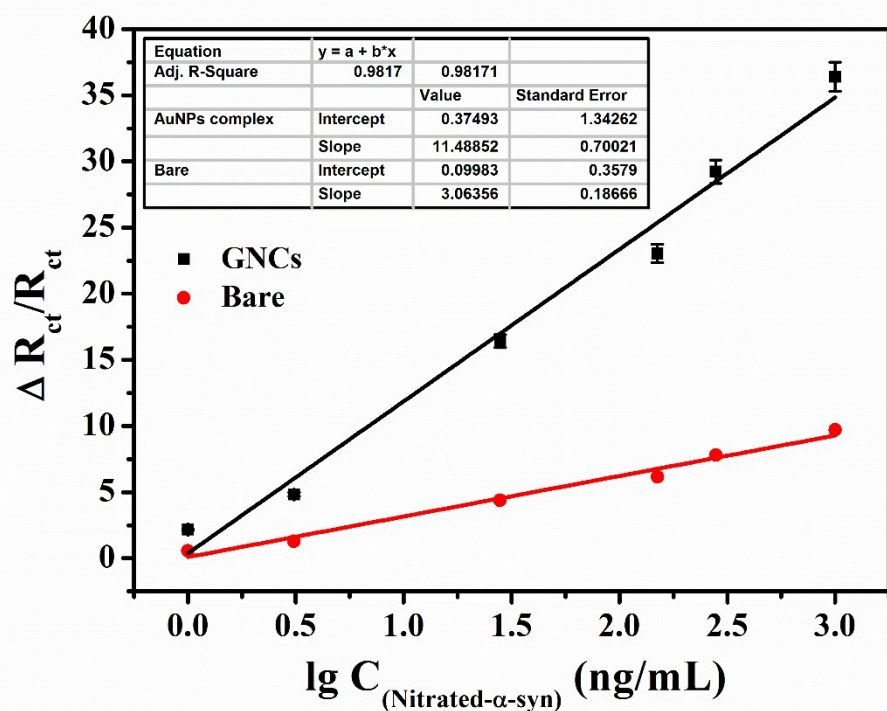

Fig.S3. The relationship between the electrode resistance response and the logarithm of nitrated  $\alpha$ -syn concentration under different background signals.

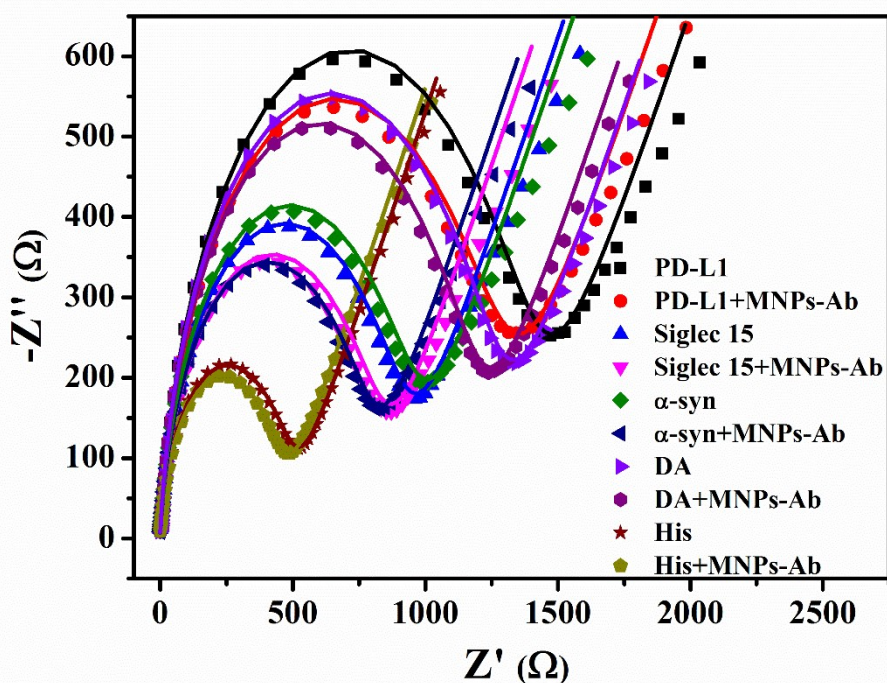

Fig. S4. EIS diagram in the process of detecting interfering substances of nitrated  $\alpha$ -syn.

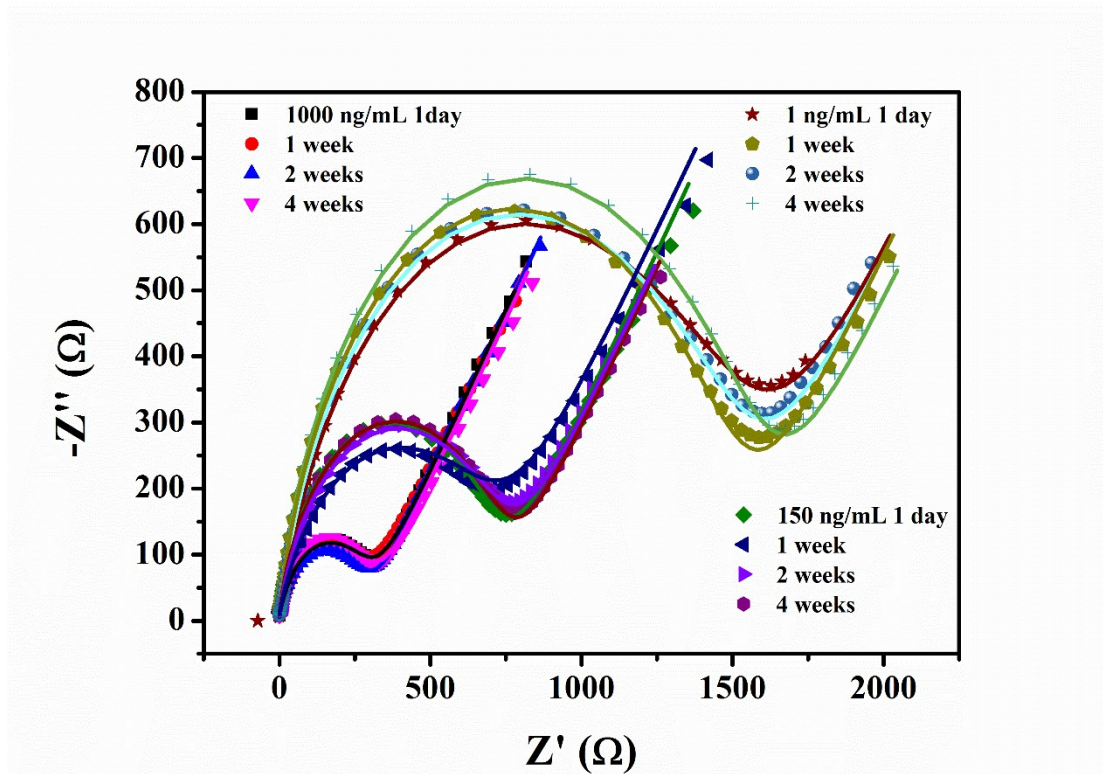

**Fig. S5.** EIS diagram of detecting different concentrations of nitrated  $\alpha$ -syn in different store time (1 day, 1 week, 2 weeks, 4 weeks).

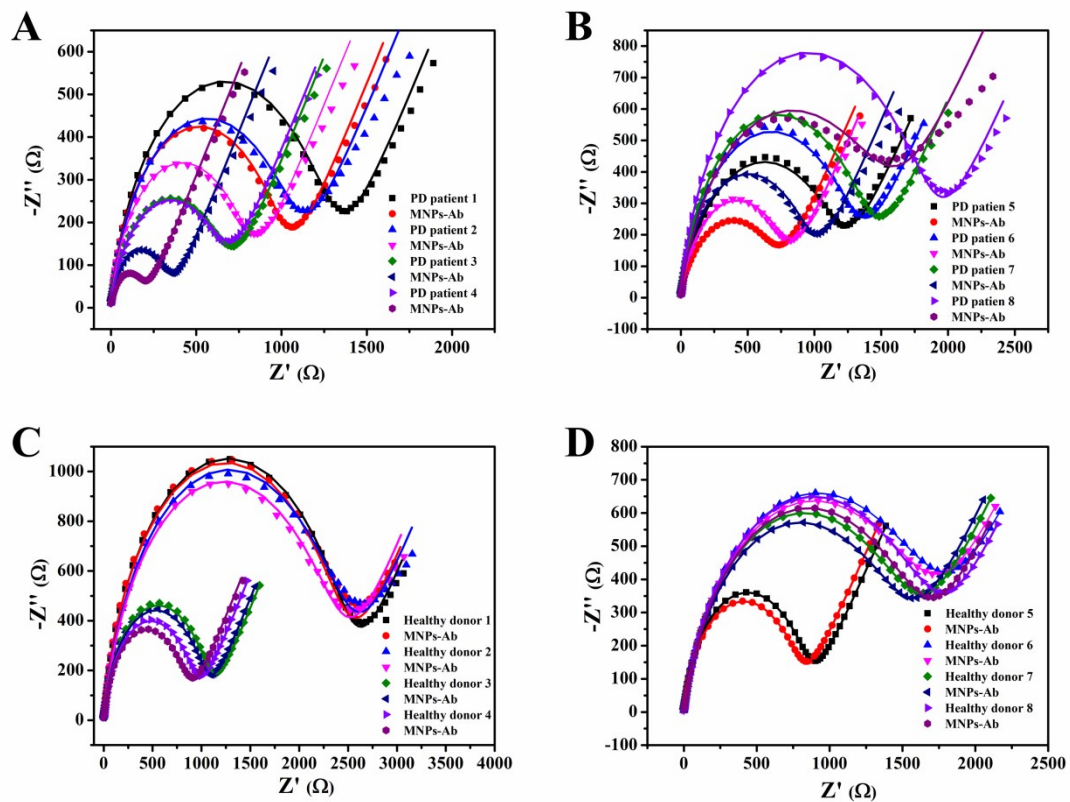

**Fig. S6.** EIS diagram for the determination of healthy donors (n=8) and PD patients (n=8).

**Table S1.** Performance comparison of various neurological disease markers biosensors

| Method                | Biomarker                    | Linear range (pg/mL)                      | LOD (pg/mL)        | Reference |
|-----------------------|------------------------------|-------------------------------------------|--------------------|-----------|
| Electrochemical assay | Tau protein                  | $1.1 \times 10^7$ - $200 \times 10^6$     | $1.1 \times 10^7$  | 1         |
| Electrochemical assay | Tau protein                  | $0.55$ - $5.5 \times 10^5$                | 1.65               | 2         |
| Electrochemical assay | Tau protein                  | $1.375 \times 10^4$ - $1.375 \times 10^7$ | $8.25 \times 10^3$ | 3         |
| Electrochemical assay | Myelin Basic Protein         | $9.259 \times 10^3$ - $9.259 \times 10^6$ | $5.55 \times 10^3$ | 3         |
| Electrochemical assay | Amyloid-beta 1-42            | $500$ - $5 \times 10^5$                   | 100                | 4         |
| Electrochemical assay | $\alpha$ -synuclein          | $1 \times 10^4$ - $1 \times 10^6$         | $3.62 \times 10^3$ | 5         |
| Electrochemical assay | $\alpha$ -synuclein oligomer | $864$ - $3.11 \times 10^8$                | 144                | 6         |
| Electrochemical assay | Nitrated $\alpha$ -syn       | $1000$ - $1 \times 10^6$                  | 310                | This work |

**Table S2.** Measurement of nitrated  $\alpha$ -syn in fetal bovine serum with the designed sensor.

| Sample | Added (ng/mL) | Theoretical $\Delta R_{ct}$ | Actual $\Delta R_{ct}$ | Recovery (%) | RSD (%) |
|--------|---------------|-----------------------------|------------------------|--------------|---------|
| 1      | 2             | 153                         | 145                    | 94.7         | 4.57%   |
| 2      | 3             | 219                         | 198                    | 90.4         | 2.41%   |
| 3      | 20            | 612                         | 562                    | 91.8         | 6.31%   |

**Table S3.** Information of clinical serum samples.

| Patient ID | Gender | Age (y) | Clinical Investigations                      | Serum time |
|------------|--------|---------|----------------------------------------------|------------|
| 1          | Male   | 58      | Parkinson's Disease                          | 12/8/2020  |
| 2          | Female | 74      | Parkinson's disease, cerebrovascular disease | 12/8/2020  |
| 3          | Male   | 68      | Parkinson's Disease                          | 12/10/2020 |
| 4          | Female | 79      | Primary parkinsonism                         | 12/8/2020  |
| 5          | Female | 53      | Parkinson's Disease                          | 12/16/2020 |
| 6          | Female | 33      | Parkinson's Disease                          | 12/17/2020 |
| 7          | Male   | 78      | Parkinson's Disease                          | 12/25/2020 |
| 8          | Male   | 72      | Parkinson's Disease                          | 1/5/2021   |
| Donor ID   | Gender | Age (y) | Clinical Investigations                      | Serum time |
| 1          | Male   | 59      | Diabetes                                     | 1/8/2021   |
| 2          | Female | 71      | Urinary Tract Infection                      | 1/8/2021   |
| 3          | Female | 73      | Diabetes                                     | 1/7/2021   |
| 4          | Female | 73      | Diabetes                                     | 1/4/2021   |
| 5          | Female | 73      | /                                            | 1/6/2021   |
| 6          | Female | 78      | Arthritis                                    | 1/6/2021   |
| 7          | Male   | 78      | Stomach cancer                               | 1/4/2021   |
| 8          | Male   | 73      | Arthritis                                    | 1/4/2021   |

## Reference

- 1 E.-V. Jose O., T. Hanna and M. Sanela, *Analyst*, 2014, **139**, 2823-2831.
- 2 S. X. Wang, D. Acha, A. J. Shah, F. Hills, I. Roitt, A. Demosthenous and M. Sanela, *Biosens. Bioelectron.*, 2016, **92**, 482-488.
- 3 B. Derkus, P. A. Bozkurt, M. Tulu, K. C. Emregul, C. Yucesan and E. Emregul, *Biosens. Bioelectron.*, 2017, **89**, 781-788.
- 4 E. C. Rama, M. B. González-García and A. Costa-Garcia, *Sens. Actuators B Chem.*, 2014, **201**, 561-571.
- 5 C. Y. Ge, M. M. Rahman, W. Zhang, N. S. Lopa, K. Jin, S. Yoon, H. Jang, G. R. Xu and W. Kim, *Sensors*, 2020, **20**, 617.
- 6 S. M. Taghdisi, N. M. Danesh, M. A. Nameghi, M. Ramezani, M. Alibolandi, M. Hassanzadeh-Khayat, A. S. Emrani and K. Abnous, *Biosens. Bioelectron.*, 2019, **123**, 14-18.
